# Supplementary material for: Comprehensive Analysis of the PD-L1 and Immune Infiltrates of m6A RNA Methylation Regulators in Head and Neck Squamous Cell Carcinoma
Source: PubMed Central journal article supplement — Mol Ther Nucleic Acids. 2020 Jun 3;21:299–314. doi: 10.1016/j.omtn.2020.06.001 (PMC7332506; doi:10.1016/j.omtn.2020.06.001), 2020-06-03
Supplement: mmc1.pdf [file mmc1.pdf]

OMTN, Volume 21

## **Supplemental Information**

### **Comprehensive Analysis of the PD-L1 and Immune Infiltrates of m<sup>6</sup>A RNA Methylation Regulators in Head and Neck Squamous Cell Carcinoma**

**Lilan Yi, Guowu Wu, Longhua Guo, Xiaofang Zou, and Ping Huang**

## Supplemental information

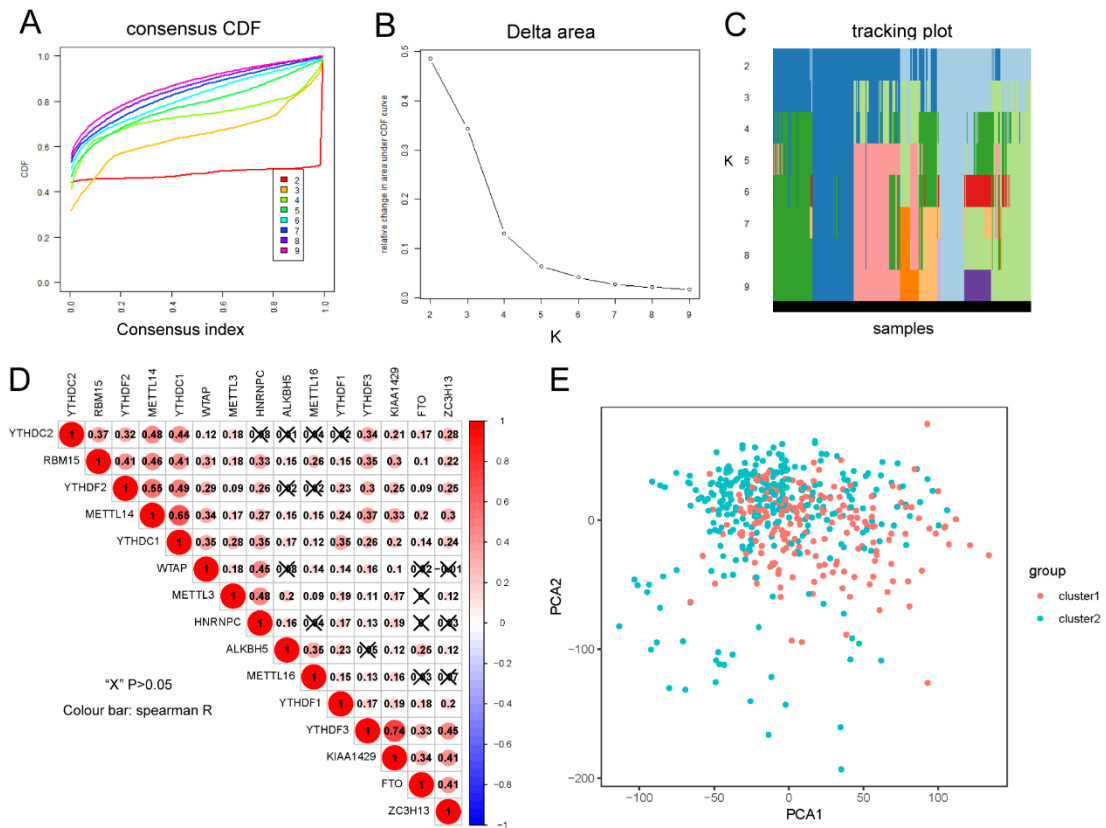

Figure S1. Consensus clusters by  $m^6A$  regulators in TCGA cohort. (A) Consensus clustering cumulative distribution function (CDF) for  $k=2$  to 9. (B) Relative change in area under the CDF curve for  $k=2$  to 9. (C) Tracking plot for  $k=2$  to 9. (D) Spearman correlation analysis of the 15  $m^6A$  methylation regulators. (E) Principal component analysis of the total mRNA expression profile in 499 patients with HNSCC.

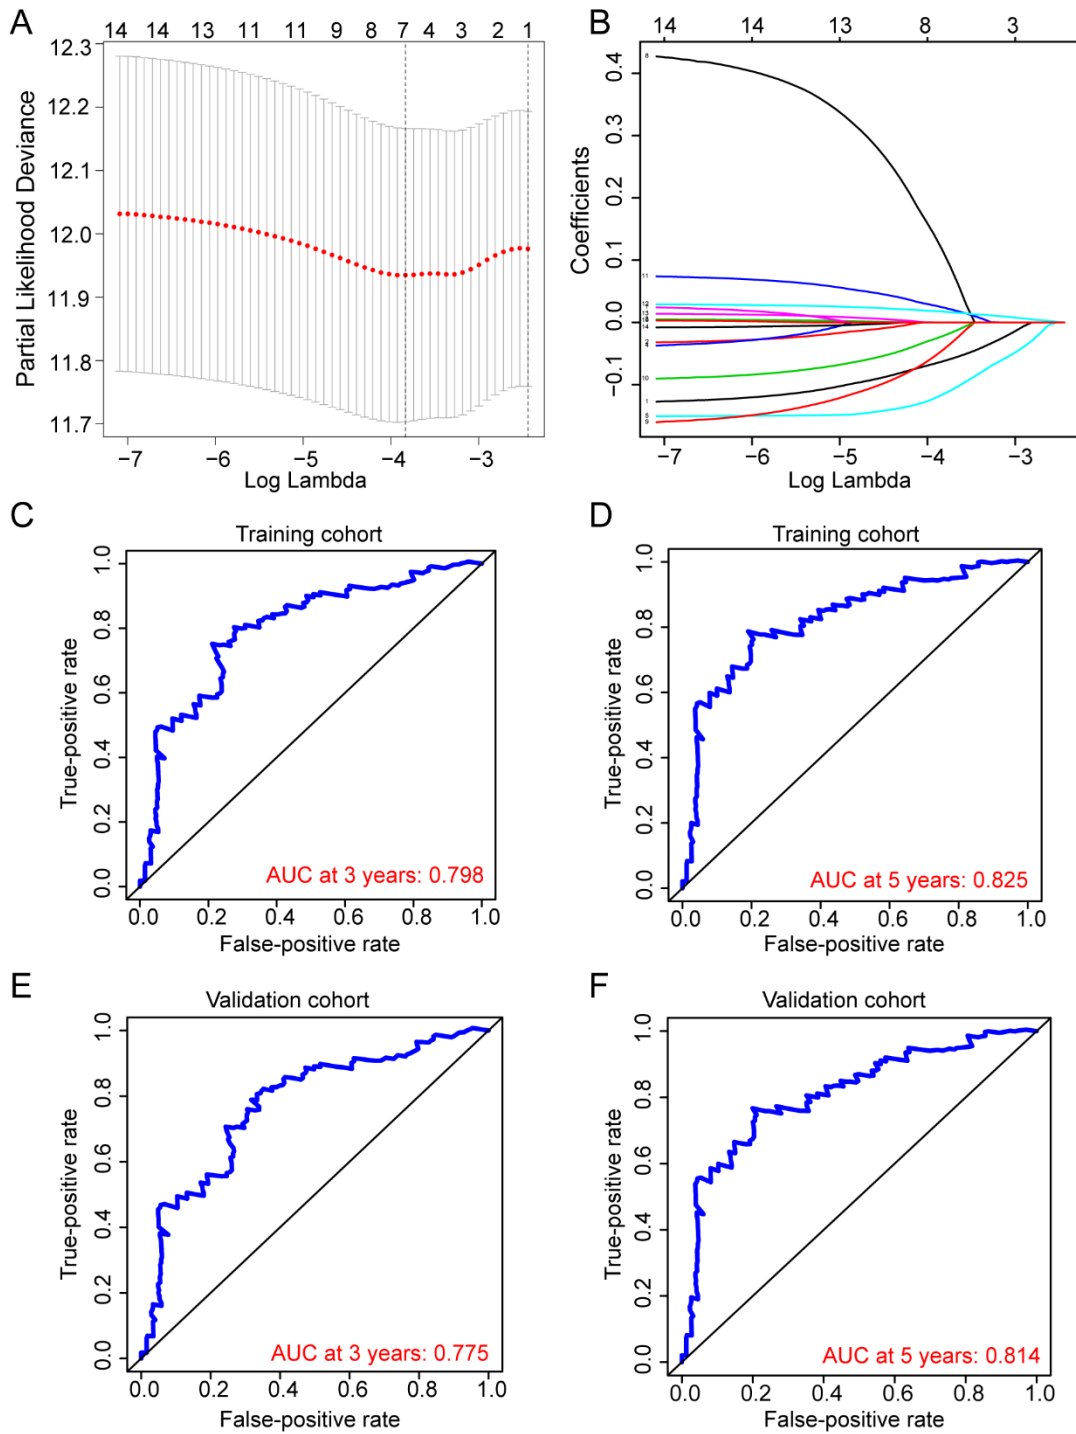

Figure S2. (A) Partial likelihood deviance for tuning the parameter selection in the LASSO regression model in TCGA cohort. (B) LASSO coefficient profiles of the 15 m<sup>6</sup>A RNA methylation regulators in TCGA cohort. (C–F) Receiver operating characteristic curves of 3 and 5 years based on the seven m<sup>6</sup>A regulator signatures in

the TCGA training cohort (C, D) and TCGA validation cohort (E, F).

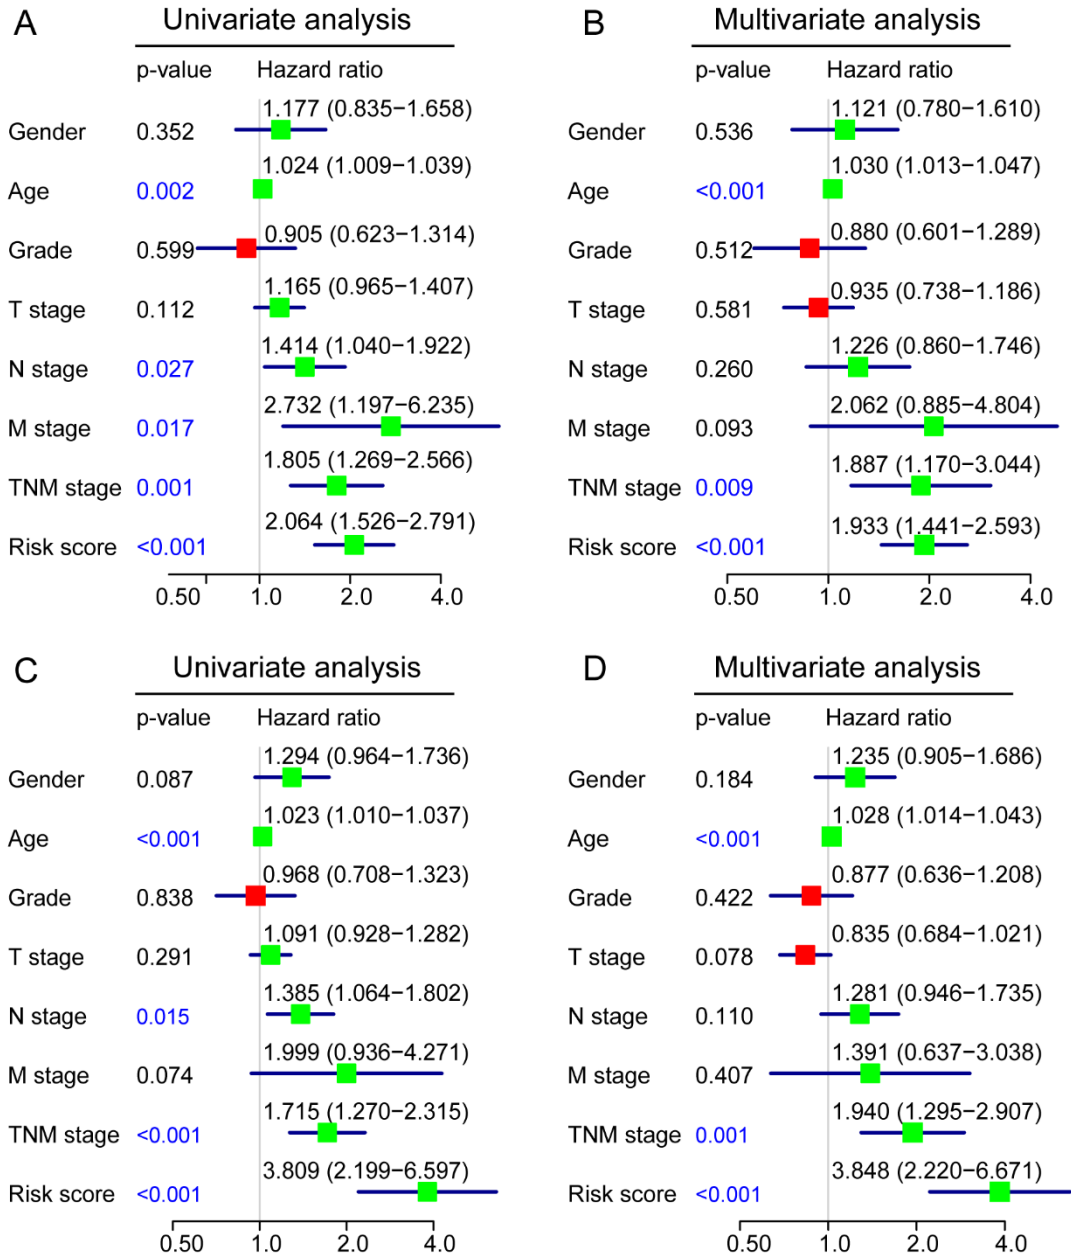

Figure S3. (A–B) Univariate (A) and multivariate (B) Cox regression analyses in the TCGA training cohort. (C–D) Univariate (C) and multivariate (D) Cox regression analyses in the TCGA validation cohort.

Table S1. Clinicopathological features of patients in TCGA training and validation cohorts.

| Variables       |        | Training cohort<br>No. (%) | Validation cohort<br>No. (%) | P-value |
|-----------------|--------|----------------------------|------------------------------|---------|
| No. of patients |        | 351                        | 148                          |         |
| Age             |        | 61(49.73)                  | 61(50.72)                    | 0.92    |
| Gender          | Female | 98(27.9)                   | 35(23.6)                     | 0.324   |
|                 | Male   | 253(72.1)                  | 113(76.4)                    |         |
| T stage         | T1     | 26(7.4)                    | 11(7.4)                      | 0.344   |
|                 | T2     | 107(30.5)                  | 38(25.7)                     |         |
|                 | T3     | 98(27.9)                   | 36(24.3)                     |         |
|                 | T4     | 120(34.2)                  | 63(42.6)                     |         |
| N stage         | N0     | 173(49.3)                  | 71(48.0)                     | 0.806   |
|                 | N1     | 62(17.7)                   | 26(17.6)                     |         |
|                 | N2     | 111(31.6)                  | 47(31.8)                     |         |
|                 | N3     | 5(1.4)                     | 4(2.7)                       |         |
| M stage         | M0     | 432(97.4)                  | 145(98)                      | 0.721   |
|                 | M1     | 9(2.6)                     | 3(2)                         |         |
| TNM stage       | I      | 17(4.8)                    | 8(5.4)                       | 0.172   |
|                 | II     | 60(17.1)                   | 20(13.5)                     |         |
|                 | III    | 55(15.7)                   | 35(23.6)                     |         |
|                 | IV     | 219(62.4)                  | 85(57.4)                     |         |
| Grade           | G1     | 43(12.3)                   | 21(14.2)                     | 0.826   |
|                 | G2     | 216(61.5)                  | 88(59.5)                     |         |
|                 | G3     | 87(24.8)                   | 38(25.7)                     |         |
|                 | G4     | 5(1.4)                     | 1(0.7)                       |         |
